# Supplementary material
Source: PubMed Central journal article supplement (PMC5692570)
Supplement: pnas.1711680114.sapp.pdf [file pnas.1711680114.sapp.pdf]

## SI Appendix, Material and Methods

### **A unique surface on Pat1 C-terminal domain directly interacts with Dcp2 decapping enzyme and Xrn1 5'-3' mRNA exonuclease in yeast**

Clément Charenton<sup>1</sup>, Claudine Gaudon-Plesse<sup>2-5</sup>, Zaineb Fourati<sup>1</sup>, Valerio Taverniti<sup>2-5</sup>, Régis Back<sup>1</sup>, Olga Kolesnikova<sup>2-5</sup>, Bertrand Séraphin<sup>2-5</sup>, Marc Graille<sup>1</sup>

<sup>1</sup> Laboratoire de Biochimie, Ecole Polytechnique, CNRS, Université Paris-Saclay, 91128 Palaiseau cedex, France.

<sup>2</sup> Institut de Génétique et de Biologie Moléculaire et Cellulaire (IGBMC), Illkirch, France

<sup>3</sup> Centre National de Recherche Scientifique (CNRS) UMR 7104, Illkirch, France

<sup>4</sup> Institut National de Santé et de Recherche Médicale (INSERM) U964, Illkirch, France

<sup>5</sup> Université de Strasbourg, Illkirch, France

Correspondence to: seraphin@igbmc.fr (Phone: +33-3-88653216) or marc.graille@polytechnique.edu (Phone: +33-1-69334890)

Running title: Pat1 directly interacts with Dcp2 and Xrn1 mRNA decay factors

Keywords: mRNA decapping, eukaryotic mRNA decay, protein-protein interaction, yeast

#### **Two-hybrid assays**

The ProQuest two-hybrid assay was used to monitor protein interaction. The desired inserts were amplified by PCR and transferred in the relevant plasmid backbones using the Gateway cloning strategy. Absence of mutation in inserts derived from PCR amplified fragment(s) was ascertained by sequencing. Point mutations were introduced by site-directed mutagenesis in the Gateway Entry plasmid pDONR221, validated by sequencing, and transferred to the relevant backbone. Plasmids are listed in SI Appendix, Table S2. Two-hybrid interaction analyses were done using standard procedure. The  $\beta$ -galactosidase activity was monitored using the Beta-Glo Assay system (Promega).

Average values and standard-error of the mean of at least two biological duplicates are plotted.

## **RNA**

For analysis of mRNA decay, 1mL aliquots of cells harboring the MFA2pG reporter (1) were collected at the indicated time points. Cell pellets were frozen in liquid nitrogen and stored at -80°C. Yeast total RNA was obtained by hot acid phenol extraction. Northern blot analyses were carried out after agarose gel electrophoresis. The reporter RNA was detected using a radiolabeled oligo(C) probe oRP121 (2). Signals were measured and quantified using PhosphorImager (GE Healthcare). The mRNA half-lives were calculated using the best fit to an exponential decay. scR1 RNA, detected with a specific radiolabeled probe (OBS144 5' TCTAGCCGCGAGGAAGGA 3'), was used as loading control.

## **Western blot analysis**

Yeast strains were grown overnight in YPDA medium and 4OD units equivalent were taken to prepare total yeast extract as described previously (3). For detection a rabbit serum containing polyclonal antibodies generated against a fragment of Pat1 was used (1:1000; kind gift from F. Wyers (4)). As loading control, the endogenous Stm1 protein was detected using polyclonal anti-Stm1 antibody (1:5000; kind gift from F. Wyers).

## **Cloning, expression and purification of ScPat1C**

The coding sequence of *Saccharomyces cerevisiae* Pat1 C-terminal domain (referred as Pat1C) encompassing residues 435 to 796 was amplified from yeast *Saccharomyces cerevisiae* S288C genomic DNA using oligonucleotides oMG47 and oMG52 (SI Appendix, Table S3 for oligonucleotides details) and inserted into pnEA-3CH vector (kind gift from C. Romier, IGBMC, Illkirch, France), yielding plasmid pMG643. The pMG754 plasmid encoding the His<sub>6</sub>-Pat1C I724R/I731R mutant was obtained by one-step site-directed mutagenesis of pMG643 using oligonucleotides oMG265 and oMG266, according to Zheng *et al.* (5). The pBS4527 plasmid containing the Pat1 R721A/R728A/F732A/E794A mutation was constructed by 3 successive rounds of site-directed mutagenesis using oligonucleotides OBS5017 and OBS5019-OBS5023. The fragment encoding for the Pat1C R721A/R728A/F732A/E794A mutant was amplified from this plasmid template using oligonucleotides oMG119 and oMG173 (SI Appendix, Table S3) and inserted into pET21a vector to yield plasmid pMG616 (SI Appendix, Table S2). Absence of other mutations was verified by sequencing.

The various Pat1C domains (His-tagged WT and mutants) used in this study were produced and purified as previously described (6). The untagged WT Pat1C domain was purified on a NiNTA column (Qiagen). Eluted protein was incubated overnight with 3C-His<sub>6</sub> protease in buffer A (20 mM Tris-HCl pH 8, 200 mM NaCl). The His-tagged 3C protease and uncleaved protein were removed by incubation with NiNTA resin. The untagged Pat1C domain was present in the flow-through and further purified by size-exclusion chromatography on Superdex 75 16/60 column (GE Healthcare) pre-equilibrated with buffer A.

### **Cloning, expression and purification of Dcp2 and Xrn1 GST fusion proteins**

DNA sequences encoding individual HLMs from Dcp2 or Xrn1 as well as Dcp2 [435-508] were amplified from *Saccharomyces cerevisiae* S288C genomic DNA using oligonucleotides oMG185-186, oMG235-254 and oMG338-339 (SI Appendix, Table S3) and then inserted in pGEX-6P-1 expression vectors (see SI Appendix, Table S2 for plasmid listing). GST-HLMs fusions were then expressed in *E. coli* BL21 (DE3) in 2YT medium supplemented with ampicillin at 50 µg/mL. At OD<sub>600</sub> = 0.8, protein expression was induced at 37°C for 3 h by adding 50 µg/mL IPTG. Cells were harvested by centrifugation and resuspended in 40 mL of buffer A supplemented with protease inhibitor cocktail. Cell lysis was performed by sonication.

All GST-HLMs constructs were purified on a Glutathione Sepharose™ 4B (GE Healthcare) column according to manufacturer instructions, and then on a Superdex™ 75 16/60 size exclusion column (GE Healthcare) equilibrated in buffer A.

### **Cloning, expression and purification of GST-Dcp1:Dcp2 complexes**

The Dcp1 coding sequence was amplified from plasmid pBS2246 containing the cloned *S. cerevisiae* Dcp1 coding sequence using OBS5397 and OBS5398. The PCR product was digested with BamHI and Sall and cloned in BamHI/Sall digested pGEX6P1 to give pBS4576. The Dcp2 [1-315]-His<sub>6</sub> coding sequence was amplified with oligonucleotides OBS5884 and OBS6664 from *S. cerevisiae* genomic DNA, and Dcp2 [1-460]-His<sub>6</sub> with OBS5884 and OBS6665. The PCR products were digested with NotI and Sall and cloned in NotI/Sall digested pBS4576 giving pBS5135 and pBS5136, respectively. Absence of mutations was verified by sequencing.

Expression of GST-Dcp1/Dcp2-His<sub>6</sub> complexes of different length, was carried out in *E. coli*

BL21(DE3) Codon<sup>+</sup> (Novagen) in 1 L of auto-inducible terrific broth media (ForMedium AIMTB0260) supplemented with ampicillin at 100 µg/mL and chloramphenicol at 25 µg/mL. At OD<sub>600</sub>=0.8, cells were transferred at 25°C for 20 h. Bacteria were harvested by centrifugation and resuspended in 40 mL of Buffer B (20 mM Tris-HCl pH 8, 200 mM NaCl pH8, 5mM β-mercaptoethanol and 1mM MgCl<sub>2</sub>) supplemented with 20 mM imidazole. Cell lysis was performed by sonication. These GST-Dcp1:Dcp2-His<sub>6</sub> constructs were purified on a NiNTA column (Qiagen), followed by an overnight 3C protease digestion in order to remove GST, an heparin column (GE Healthcare) and finally a Superdex200 16/60 size exclusion column (GE Healthcare) in buffer B.

### **Crystallization and structures determination**

Prior to crystallization trials, the Pat1C Q706A/L713A mutant domain (10 mg/mL) was incubated with a two-fold molar excess of either Dcp2 HLM2 (Dcp2[435-451]), HLM3 (Dcp2[484-500]) or HLM10 (Dcp2[954-970]) peptides. The Pat1C(Q706A/L713A):Dcp2[HLM3] complex was crystallized using vapor diffusion method in hanging drop at 24°C, by adding 1 µL of Pat1C(Q706A/L713A):Dcp2[HLM3] mix in buffer B to an equal volume of crystallization solution (200mM MgCl<sub>2</sub>, 24% PEG 3350). Crystals of Pat1C(Q706A/L713A):Dcp2[HLM2] and Pat1C(Q706A/L713A):Dcp2[HLM10] complexes were obtained in the same conditions by streak-seeding using Pat1C(Q706A/L713A):Dcp2[HLM3] crystals. Crystals were cryo-protected by transfer into their crystallization condition supplemented with the corresponding peptide (two-fold molar excess) and with progressively higher ethylene glycol concentration up to 30% and then flash-frozen in liquid nitrogen.

All datasets were collected on beam-lines Proxima-1 and Proxima-2 (Synchrotron SOLEIL, Saint-Aubin, France). Data indexing and processing were performed with the program XDS (7). All these crystals belong to space group I222 with two copies of Pat1C-HLM complex per asymmetric unit. The structures were solved by molecular replacement using PHASER MR (8) from the CCP4 program suite, searching for two copies of free Pat1C structure (6) by asymmetric unit. Successive building/refinement cycles were carried out using the COOT (9) and the BUSTER (10) programs. Statistics on data collection and structure refinement are summarized in SI Appendix, Table S4.

The final model for Pat1C:HLM2 complex contains Pat1C residues 468 to 644 and 658 to 796 (protomer A) and residues 468 to 600, 604 to 647 and 659 to 795 (protomer B) as well as Dcp2

residues 437 to 450 (protomer C) and 438 to 449 (protomer D). No water molecules were modelled because of the poor quality of the electron density maps resulting from highly anisotropic diffraction data. The final model for Pat1C:HLM3 complex contains Pat1C residues 472 to 646 and 660 to 796 (protomer A) and residues 473 to 599, 604 to 653 and 656 to 796 (protomer B) as well as Dcp2 residues 484 to 500 (protomers C and D), nine molecules of ethylene glycol used as cryoprotectant, one  $Mg^{2+}$  and two  $Cl^-$  ions from the crystallization conditions and 143 water molecules. For Pat1C:HLM10 complex, Pat1C residues 468 to 645 and 659 to 796 (protomer A) and residues 473 to 517 and 521 to 796 (protomer B) could be modeled into the 2Fo-Fc electron density map, as well as Dcp2 residues 957 to 969 (protomer C) and 958 to 970 (protomer D), thirteen molecules of ethylene glycol used as cryoprotectant, one  $Mg^{2+}$  ion from the crystallization condition, one Tris molecule from the protein buffer and 196 water molecules.

### **Pull-down assays**

Pull-down experiments were performed by mixing either 1.13 nmol of His-tagged Pat1C with an equal molar amount of GST-HLMs fusions or 280 pmol of His-tagged Dcp2 in complex with Dcp1 with an equal molar amount of untagged Pat1C. Binding buffer (20 mM Tris-HCl pH 7.5, 100 mM NaCl, 50 mM Imidazole, 10% Glycerol) was added to a final volume of 60  $\mu$ L. The reaction mixtures were incubated on ice for 1 hour. 10  $\mu$ L was withdrawn as “input” fraction for SDS-PAGE analysis. The remaining 50  $\mu$ L were incubated with 500  $\mu$ g of HisPur™ Ni-NTA Magnetic Beads (Thermo Scientific) equilibrated in binding buffer to a final volume of 200  $\mu$ L at 4°C for 2 hours. Beads were washed three times with 500  $\mu$ L of Binding Buffer. Bound proteins were eluted with 250 mM Imidazole. Samples were resolved on 15% SDS-PAGE and visualized by Coomassie blue staining.

### **Fluorescence anisotropy**

Unlabeled and FITC-labeled peptides were synthesized by the IGBMC Peptide Synthesis facility using the Fmoc chemistry. Crude peptide products were purified by reverse phase high performance liquid chromatography (HPLC). Quality and purity of the final products were assessed by HPLC and mass spectrometry.

Affinities between Pat1C and the different HLM peptides were quantified by fluorescence anisotropy using a FP8300 spectrofluorimeter (Jasco) at 20°C. Increasing amounts of Pat1C (0 to 30-40  $\mu$ M) were added into a solution composed of 20 mM Tris-HCl pH 8, 200 mM NaCl and

containing the respective HLMs peptide N-terminally fused to FITC (HLM-FITC) at a concentration of 10 nM in a 400  $\mu$ L final volume.  $K_{d_{\text{HLM-FITC}}}$  and  $dR_{\text{max}}$  (maximum value of anisotropy difference) were calculated by fitting experimental curves with equation (A) using the program OriginLabs:

$$(A) \quad dR = (dR_{\text{max}} * [\text{Pat1C}]) / (K_{d_{\text{HLM-FITC}}} + [\text{Pat1C}])$$

where  $dR$  is the anisotropy difference for a given Pat1C concentration ( $[\text{Pat1C}]$ ).

Control experiments were performed by chasing HLM2 fluorescent peptide (10 nM) by increasing concentrations of the corresponding unlabeled peptide and dissociation constant ( $K_{d_{\text{HLM}}}$ ) was determined by fitting experimental curve with equation (B):

$$(B) \quad dR = (dR_{\text{max}} * [\text{Pat1C}]) / ([\text{Pat1C}] + K_{d_{\text{HLM-FITC}}} * ([\text{HLM}] / K_{d_{\text{HLM}}} + 1))$$

where  $dR$  is the anisotropy difference for a given concentration of unlabeled HLM peptide ( $[\text{HLM}]$ ).

## SI Appendix, Supplementary Figures

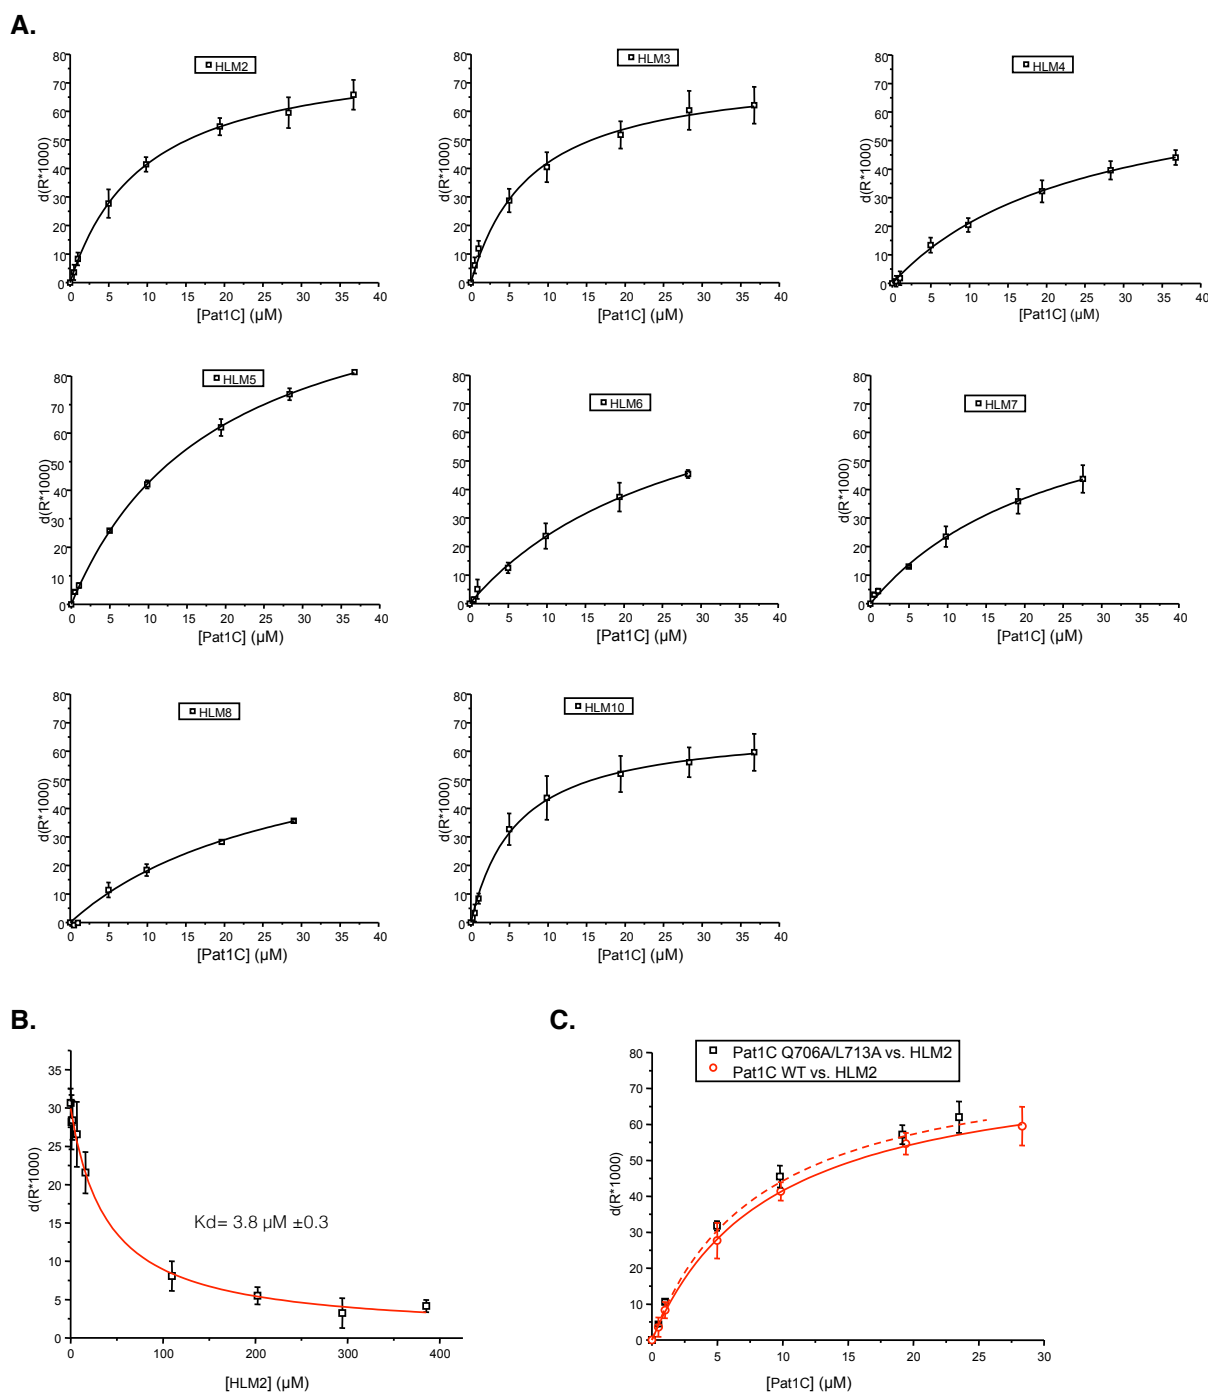

**Figure S1: Binding of Dcp2 HLM peptides to Pat1C.**

- A.** Fluorescence anisotropy analyses of Dcp2 HLM peptides binding to Pat1C. FITC-labeled HLM peptides (10 nM) were incubated with increasing amount of purified recombinant yeast Pat1C protein. The graph represents the difference in anisotropy between the free fluorescent peptides and the reaction mix as a function of Pat1C concentration. The curves obtained after fitting of the experimental data with equation (A) from the materials and methods section, are shown as a solid line. Error bars were calculated from triplicate experiments.
- B.** Chase experiments of an FITC-labeled HLM2 peptide (10 nM) bound to Pat1 (20  $\mu$ M) by an unlabeled HLM2 peptide. The curve obtained after fitting of the experimental data with equation (B) from the materials and methods section, is shown as a solid red line. Error bars

were calculated from triplicate experiments.

- C. Titration of a FITC-HLM2 peptide from Dcp2 by either the Pat1C WT domain (red open circles) or the Pat1C Q706A/L713A mutant (black open squares). The curves obtained after fitting of the experimental data with equation (A) from the materials and methods section, are shown as a solid (WT) or dashed (Q706A/L713A) red lines. Error bars were calculated from triplicate experiments.



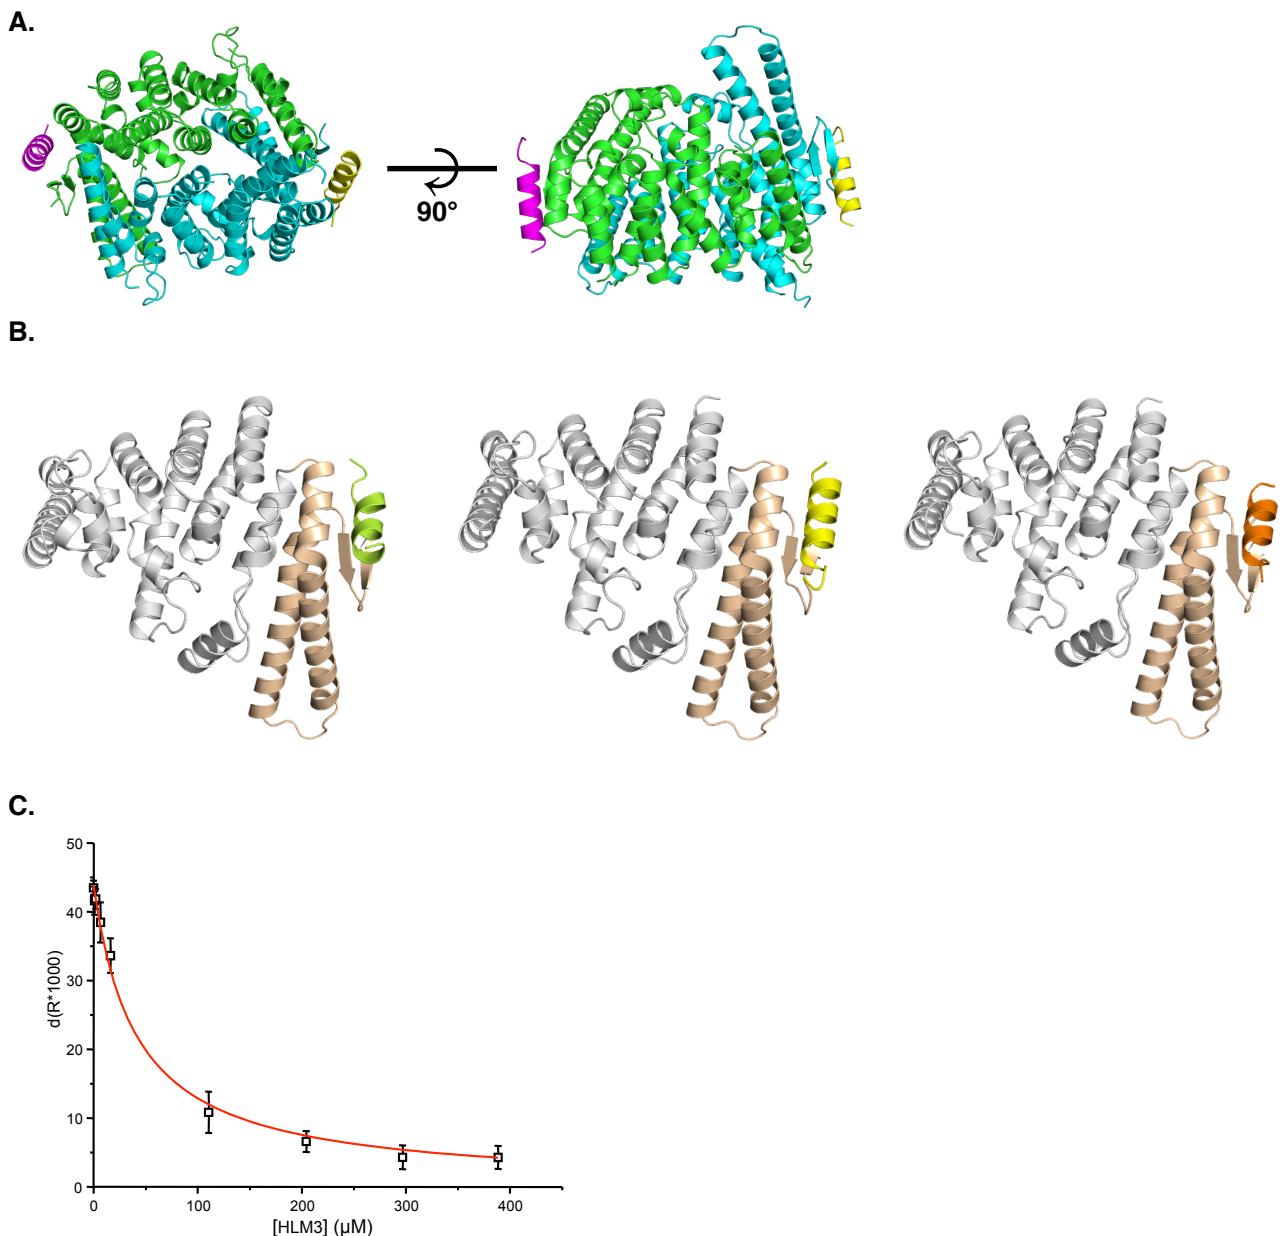

**Figure S2: Dcp2 HLM peptides bind to the same region on Pat1C.**

- A.** Ribbon representation of Pat1C-HLM dimers present in the asymmetric unit illustrated for Pat1C-HLM3 complex. Pat1C monomers are colored in green and cyan while Dcp2 HLM peptides are in magenta and yellow. The right panel is rotated 90° along the horizontal axis relative to the left panel.
- B.** Ribbon representation of complexes formed between Pat1C (grey) and Dcp2 HLM2 (left), HLM3 (middle) and HLM10 (right) peptides. The Dcp2 HLM2, HLM3 and HLM10 peptides are colored green, yellow and orange, respectively. The fungi-specific Pat1 region is colored in beige.
- C.** Chase experiments of a FITC-labeled HLM2 peptide (10 nM) bound to Pat1 (20 µM) by an unlabeled HLM3 peptide. The curve obtained after fitting of the experimental data with equation (B) from the materials and methods section, is shown as a solid red line. Error bars were calculated from triplicate experiments.



The sequence of each HLM peptide co-crystallized with ScPat1C is given with the following code: residues not present in the final model due to the absence of electron density map (?); residues making no contact with Pat1 (.); residues directly involved in the interaction with Pat1 (closed black circles); residues engaged in crystal packing (closed back diamonds).

For each of the six Pat1 - Dcp2 HLM complexes (two per HLM peptide), this figure shows the Pat1 proteins present in the close vicinity of the HLM peptide (colored in magenta or yellow for complexes 1 and 2, respectively) in the asymmetric unit (cartoon representation in cyan and green) or in neighboring asymmetric units (grey surface).

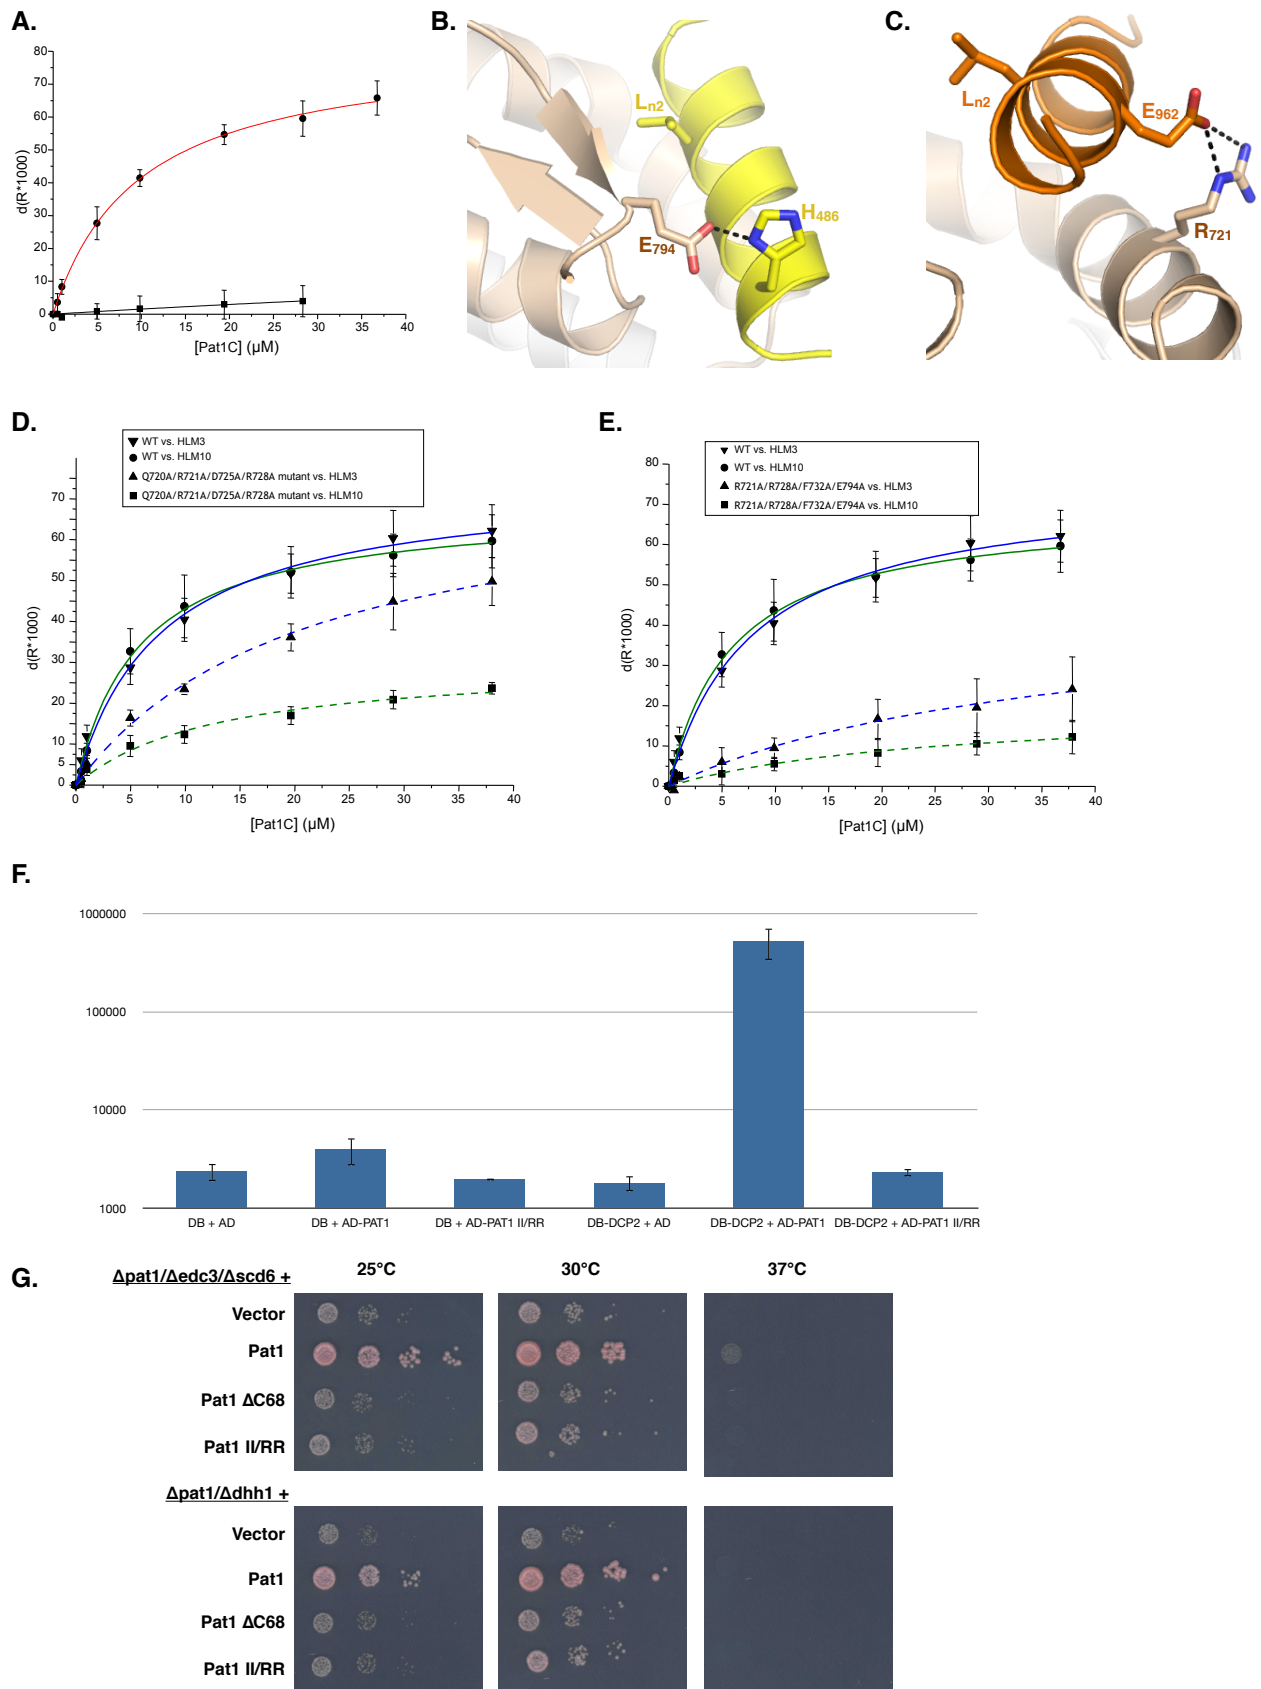

**Figure S4: Mutants affecting Pat1C-Dcp2 HLM interaction.**

**A.** Titration of WT (closed circles) or L443A-L444A (closed squares) FITC-HLM2 peptides from Dcp2 by the Pat1C domain. The curves obtained after fitting of the experimental data with equation (A) from the materials and methods section, are shown as a solid (WT) or dashed

(Q706A/L713A) lines. Error bars were calculated from triplicate experiments.

- B.** Ribbon representation of the Pat1C-HLM3 complex. The electrostatic interaction formed between Pat1C E794 and H486 from Dcp2 HLM3 is depicted by a black dashed line. L<sub>n2</sub> side chain from the HLM motif is shown as stick as a reference mark.
- C.** Ribbon representation of the Pat1C-HLM10 complex. The electrostatic interaction formed between Pat1C R721 and E962 from Dcp2 HLM10 is depicted by a black dashed line. L<sub>n2</sub> side chain from the HLM motif is shown as stick as a reference mark.
- D.** Titration of HLM3 or HLM10 peptides from Dcp2 by either Pat1C WT or Q720A/R721A/D725A/R728A mutant. The curves obtained after fitting of the experimental data with equation (A) from the materials and methods section, are shown as a solid (WT) or dashed (Q720A/R721A/D725A/R728A) lines. Fitted curves for HLM3 or HLM10 peptides are colored blue or green, respectively. Error bars were calculated from triplicate experiments.
- E.** Titration of HLM3 or HLM10 peptides from Dcp2 by either Pat1C WT or R721A/R728A/F732A/E794A mutant. The curves obtained after fitting of the experimental data with equation (A) from the materials and methods section, are shown as a solid (WT) or dashed (R721A/R728A/F732A/E794A) lines. Fitted curves for HLM3 or HLM10 peptides are colored blue or green, respectively. Error bars were calculated from triplicate experiments.
- F.** Effect of the II/RR Pat1 mutation on Dcp2 binding as monitored by yeast two-hybrid assay.
- G.** Growth analysis of PAT1 mutants in *pat1Δ/dhh1Δ* and *pat1Δ/edc3Δ/scd6Δ* strains. Serial dilutions of the different strains transformed with vector, a plasmid encoding wild type Pat1, Pat1ΔC68, or Pat1 II/RR ScPat1 mutants were spotted on -TRP plates and incubated at the indicated temperatures for 3 days.

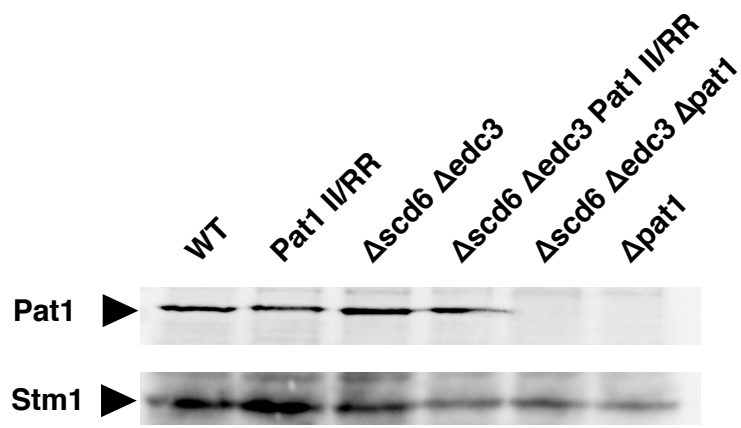

**Figure S5: Western blot analysis of Pat1 levels in strains with the indicated genotypes.**  
The yeast Stm1 protein was used as a loading control.

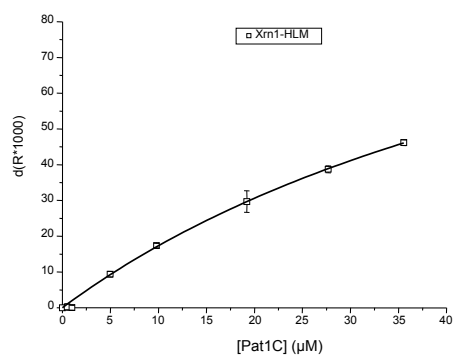

**Figure S6: Xrn1 HLM peptide binding to Pat1C.**

Fluorescence anisotropy analyses of Xrn1 HLM peptide binding to Pat1C. FITC-labeled HLM peptide (10 nM) was incubated with increasing amount of purified recombinant yeast Pat1C protein. The graph represents the difference in anisotropy between the free fluorescent peptides and the reaction mix as a function of Pat1C concentration. The curves obtained after fitting of the experimental data with equation (A) from the materials and methods section, are shown as a solid line. Error bars were calculated from triplicate experiments.

## SI Appendix, Supplementary Tables

**Table S1 : Yeast strains**

| Name    | Genotype                                                                                                                                                                                                         | Reference  | Use               |
|---------|------------------------------------------------------------------------------------------------------------------------------------------------------------------------------------------------------------------|------------|-------------------|
| BMA64   | MAT $\alpha$ ; ura3-1; $\Delta$ trp1; ade2-1; leu2-3,112; his3-11,15                                                                                                                                             | (11)       | Functional assays |
| YFW168  | MAT $\alpha$ ; ura3-1; $\Delta$ trp1; ade2-1; leu2-3,112; his3-11,15; $\Delta$ pat1::HIS3; $\Delta$ dhh1::Kan <sup>R</sup>                                                                                       | (6)        | Functional assays |
| BSY1133 | MAT $\alpha$ , ade2-1, his3-11, -15, leu2-3, -112, trp1-1, ura3-1 $\Delta$ pat1::HIS3                                                                                                                            | This work  | Functional assays |
| BSY2601 | MAT $\alpha$ ; ura3-1 or ura3-52; trp1-1 or $\Delta$ trp1; ade2-1; leu2-3,112; his3-11,15; $\Delta$ pat1::HIS3; $\Delta$ scd6::Kan <sup>R</sup> ; $\Delta$ edc3::Nat <sup>R</sup>                                | (6)        | Functional assays |
| BSY2602 | MAT $\alpha$ ; ura3-1 or ura3-52; trp1-1 or $\Delta$ trp1; ade2-1; leu2-3,112; his3-11,15; $\Delta$ pat1::HIS3; $\Delta$ scd6::Kan <sup>R</sup> ; $\Delta$ edc3::Nat <sup>R</sup>                                | (6)        | Functional assays |
| BSY3007 | MAT $\alpha$ ; ura3-1; $\Delta$ trp1; ade2-1; leu2-3,112; his3-11,15; dcp2(1-300)::VSV-KAN <sup>R</sup>                                                                                                          | This work  | Functional assays |
| BSY3089 | MAT $\alpha$ ; ura3-1; $\Delta$ trp1; ade2-1; leu2-3,112; his3-11,15; pat1 I724R/I731R                                                                                                                           | This work  | Functional assays |
| BSY3113 | MAT $\alpha$ ; ade 2-1; his3-11,15; leu2-3,112; $\Delta$ trp1, ura3-1, can1-100, $\Delta$ edc3::NAT <sup>R</sup> ; $\Delta$ scd6::Kan <sup>R</sup>                                                               | This work  | Functional assays |
| BSY3112 | MAT $\alpha$ ; ade 2-1; his3-11,15; leu2-3,112; $\Delta$ trp1, ura3-1, can1-100, $\Delta$ edc3::NAT <sup>R</sup> ; $\Delta$ scd6::Kan <sup>R</sup> ; pat1 I724R/I731R                                            | This work  | Functional assays |
| MAV203  | MAT $\alpha$ ; leu2-3,112; trp1-901; his3 $\Delta$ 200; ade2-101; gal4 $\Delta$ ; gal80 $\Delta$ ; SPAL10::URA3; GAL1::lacZ; HIS3UAS GAL1::HIS3@LYS2; can1 <sup>R</sup> ; cyh2 <sup>R</sup>                      | Invitrogen | Two-hybrid        |
| BSY3010 | MAT $\alpha$ ; leu2-3,112; trp1-901; his3 $\Delta$ 200; ade2-101; gal4 $\Delta$ ; gal80 $\Delta$ ; SPAL10::URA3; GAL1::lacZ; HIS3UAS GAL1::HIS3@LYS2; can1 <sup>R</sup> ; cyh2 <sup>R</sup> ; dcp2 1-247 ::kanMX | This work  | Two-hybrid        |
| BSY3011 | MAT $\alpha$ ; leu2-3,112; trp1-901; his3 $\Delta$ 200; ade2-101; gal4 $\Delta$ ; gal80 $\Delta$ ; SPAL10::URA3; GAL1::lacZ; HIS3UAS GAL1::HIS3@LYS2; can1 <sup>R</sup> ; cyh2 <sup>R</sup> ; dcp2 1-300 ::kanMX | This work  | Two-hybrid        |
| BSY3012 | MAT $\alpha$ ; leu2-3,112; trp1-901; his3 $\Delta$ 200; ade2-101; gal4 $\Delta$ ; gal80 $\Delta$ ; SPAL10::URA3; GAL1::lacZ; HIS3UAS GAL1::HIS3@LYS2; can1 <sup>R</sup> ; cyh2 <sup>R</sup> ; dcp2 1-663 ::kanMX | This work  | Two-hybrid        |



**Table S2 : Plasmids**

| Name    | Description                            | Reference or oligonucleotides |
|---------|----------------------------------------|-------------------------------|
| pGEX6P1 |                                        | Amersham                      |
| pBS4576 | GST-yDCP1 (pGEX-6P-1)                  | OBS5397/OBS5398               |
| pBS5135 | GST-yDCP1/DCP2[1-315]-6HIS (pGEX-6P-1) | OBS5884/OBS6664               |
| pBS5136 | GST-yDCP1/DCP2[1-460]-6HIS (pGEX-6P-1) | OBS5884/OBS6665               |
| pBS2379 | pFA6a-KanMX6                           | (12)                          |
| pCAS    | CAS9 and gRNA LYP1                     | (13)                          |
| pBS5391 | CAS9 and gRNA PAT1                     | OBS6969/OBS6970               |
| pBS2368 | pDEST32 yEDC3                          | Gift from N.Cougot            |
| pBS3892 | pDONR221 yDHH1                         | OBS4230/OBS4231               |
| pBS3909 | pDEST32 yDHH1                          | This work                     |
| pBS2371 | pDEST32 yDCP2                          | Gift from N.Cougot            |
| pBS2411 | pEXP-AD502                             | Invitrogen                    |
| pBS2410 | pDB-Leu                                | Invitrogen                    |
| pBS2374 | pDEST22 yPAT1                          | Gift from N.Cougot            |
| pBS5131 | pDONR221 yPAT1 I724R/I731R             | OBS6661/OBS6662               |
| pBS4907 | pDEST22 yPAT1 DC68                     | (6)                           |
| pBS5133 | pDEST22 yPAT1 I724R/I731R              | This work                     |
| pBS2371 | pDEST32 yDCP2                          | Gift from N.Cougot            |
| pBS3841 | pDONR221 yDCP2 [436-663]               | OBS4108/OBS4107               |
| pBS3859 | pDEST32 yDCP2 [436-663]                | This work                     |
| pBS3845 | pDONR221 yDCP2 [368-460]               | OBS4110/OBS4111               |
| pBS3867 | pDEST32 yDCP2 [368-460]                | This work                     |
| pBS5125 | pDONR221 yDCP2 [450-663]               | OBS6644/OBS4107               |
| pBS5127 | pDEST32 yDCP2 [450-663]                | This work                     |
| pBS5141 | pDONR221 yDCP2 3[68-460] HLM2*         | OBS6682/OBS6646               |
| pBS5144 | pDEST32 yDCP2 [368-460] HLM2*          | This work                     |
| pBS5175 | pDONR221 yDCP2 [450-663] HLM3*         | OBS6647/OBS6648               |
| pBS5187 | pDEST32 yDCP2 [450-663] HLM3*          | This work                     |
| pRS414  | Shuttling vector with TRP1 marker      | (14)                          |
| pBS4357 | pRS414 yPAT1                           | (6)                           |
| pBS4421 | pRS414 yPAT1 $\Delta$ C68              | (6)                           |
| pBS5186 | pRS414 yPAT1 I724R/I731R               | This work                     |

|         |                                                       |                 |
|---------|-------------------------------------------------------|-----------------|
| pBS4527 | pRS414 yPAT1 R721A/R728A/F732A/E794A                  | This work       |
| pBS5441 | pDONR221 yXRN1 [1-1456]                               | OBS4232/OBS7063 |
| pBS5453 | pDEST32 yXRN1 [1-1456]                                | This work       |
| pBS5462 | pDONR221 yXRN1 [1-1456] HLM*                          | OBS7080/OBS7081 |
| pBS5480 | pDEST32 yXRN1 [1-1456] HLM*                           | This work       |
| RP485   | MFA2pG reporter with URA3 marker                      | (1)             |
| pMG606  | 6His-yPat1[435-796] Q706A/L713A (pET-21a)             | (6)             |
| pMG610  | 6His-yPat1[435-796] Q720A/R721A/D725A/R728A (pET-21a) | (6)             |
| pMG616  | 6His-yPat1[435-796] R721A/R728A/F732A/E794A (pET-21a) | oMG119/oMG173   |
| pMG621  | GST-yDcp2[435-508] (pGEX-6P-1)                        | oMG185/oMG186   |
| pMG631  | GST-yDcp2[433-457]HLM2 (pGEX-6P-1)                    | oMG237/oMG238   |
| pMG632  | GST-yDcp2[482-506]HLM3 (pGEX-6P-1)                    | oMG239/oMG240   |
| pMG633  | GST-yDcp2[785-819]HLM5 (pGEX-6P-1)                    | oMG243/oMG244   |
| pMG634  | GST-yDcp2[817-841]HLM6 (pGEX-6P-1)                    | oMG245/oMG246   |
| pMG635  | GST-yDcp2[923-947]HLM9 (pGEX-6P-1)                    | oMG251/oMG252   |
| pMG636  | GST-yDcp2[952-970]HLM10 (pGEX-6P-1)                   | oMG253/oMG254   |
| pMG637  | GST-yDcp2[263-287]HLM1 (pGEX-6P-1)                    | oMG235/oMG236   |
| pMG643  | 6His-yPat1[435-796] (pnEA-3CH)                        | oMG47/oMG52     |
| pMG677  | GST-yDcp2[862-886]HLM7 (pGEX-6P-1)                    | oMG247/oMG248   |
| pMG678  | GST-yDcp2[887-911]HLM8 (pGEX-6P-1)                    | oMG249/oMG250   |
| pMG680  | GST-yDcp2[723-747]HLM4 (pGEX-6P-1)                    | oMG241/oMG242   |
| pMG754  | 6His-yPat1[435-796] I724R/I731R (pnEA-3CH)            | oMG265/oMG266   |
| pMG761  | GST-yXrn1 [1277-1301] (pGEX-6P-1)                     | oMG338/oMG339   |

For *E. coli* over-expression plasmids, the plasmid backbone used for cloning is indicated into brackets.

**Table S3 : Oligonucleotides**

| Name    | Sequence                                 |
|---------|------------------------------------------|
| oMG47   | GGATATCCATATGTCTTCAGGGTCCTCCTCT          |
| oMG52   | GGGGGATCCTTACTTTAGTTCTGATATTCACC         |
| oMG119  | TTTTTGCGGCCGCTTACTTTAGTTCTGATATTCACCATCG |
| oMG173  | TTTTTGCGGCCGCTTACTTTAGTGCTGATATTCACCATCG |
| oMG185  | GGGAAGGATCCAGCAGCTCCTCCCCTGGGC           |
| oMG186  | TTTTTGCGGCCGCTTA GGAAGCGTGTATCTTCTGCGA   |
| oMG235  | GACGGATCCAAGGAGGAGCAGATTGA               |
| oMG236  | CATGCGGCCGCTCAATTACTGTTAGCTTGCA          |
| oMG237  | GACGGATCCTCTGGTTACAGCAGCTC               |
| oMG238  | CATGCGGCCGCTCATTGCACGTTGCTGTCAG          |
| oMG239  | GACGGATCCGATGAACTGCTCATTCAA              |
| oMG240  | CATGCGGCCGCTCAGTGTATCTTCTGCGATGA         |
| oMG241  | GACGGATCCTCAAGCTCCAATGTGTCT              |
| oMG242  | CATGCGGCCGCTCATGAAGATACAGTAGAGGAA        |
| oMG243  | GACGGATCCTCAAGTATAAACGATGCGA             |
| oMG244  | CATGCGGCCGCTCATGGTGCTGTAATGTCTTT         |
| oMG245  | GACGGATCCTCATACTCGCAGAAAAATT             |
| oMG246  | CATGCGGCCGCTCAGCGAGGGTACCCG              |
| oMG247  | GACGGATCCAATCAAGAATTAGATAAGAA            |
| oMG248  | CATGCGGCCGCTCACTCATACCCATCATTAA          |
| oMG249  | GACGGATCCAATATTTCAAATAAGGACAG            |
| oMG250  | CATGCGGCCGCTCAATTGAAGGCGCTGCTG           |
| oMG251  | GACGGATCCGCATCTGATAACAACGAA              |
| oMG252  | CATGCGGCCGCTCACTCATTATTGCACTAGAC         |
| oMG253  | GACGGATCCGTCCGTTCTGAATGG                 |
| oMG254  | CATGCGGCCGCTCACTTCCTATGCAAA              |
| oMG265  | GAATCATTAGGGATGAAGTACGTGATGAAAGGTTTGCCAC |
| oMG266  | GTGGCAAACCTTTCATCACGTACTTCATCCCTAATGATTC |
| oMG338  | CCCGGATCCGAAAAACTGAGAAAA                 |
| oMG339  | GGGGCGGCCGCTTATTCAGAATTCTTTTC            |
| OBS144  | TCTAGCCGCGAGGAAGGA                       |
| OBS5017 | AAACCACCAGGCCATCATTATTGATGAAG            |

|         |                                                                                                                             |
|---------|-----------------------------------------------------------------------------------------------------------------------------|
| OBS5019 | ATAATGATGGCCTGGTGGTTTAGCTTCC                                                                                                |
| OBS5020 | AATATCAGCGCTAAAGTAAGATTTTTCCTG                                                                                              |
| OBS5021 | TTACTTTAGCGCTGATATTCACCATCGCG                                                                                               |
| OBS5022 | TGAAGTAGCTGATGAAATCGCTGCCACTATTAACG                                                                                         |
| OBS5023 | GTGGCAGCGATTCATCAGCTACTTCATCAATAATG                                                                                         |
| OBS6649 | GTAATAATAATGCGGTCTCCAACGGACAGGTACCCTCGAGCCAAGAGTGAC<br>GGATCCCCGGGTTAATTA                                                   |
| OBS6650 | CATTTACAGTGTGTCTATAAAACGTATAACACTTATTCTT<br>GAATTCGAGCTCGTTTAAAC                                                            |
| OBS6651 | GGTTAAGGCATCAGAGGCAAATAAAAAATGAAGATCAATTGTGACGGATCC<br>CCGGGTTAATTA                                                         |
| OBS6652 | GACAACTCCAAATTAATTAGCCAAGATATTTAAAAGAGAACTGACGGATCC<br>CCGGGTTAATTA                                                         |
| OBS5397 | GCGCGGATCCATGACCGGAGCAGCAACTGCAGCA                                                                                          |
| OBS5398 | GCGCGTCGACTCAAGCAAAGAATCTTTTGGCTC                                                                                           |
| OBS5884 | GACTGTCGACTAAGGAGGATATATATGTCACTGCCGCTACGACAC                                                                               |
| OBS6664 | GACTGCGGCCGCTCAGTGATGGTGATGGTGATGCTTCTGTTGGTTGTGTTC                                                                         |
| OBS6665 | GATCGCGGCCGCTCAGTGATGGTGATGGTGATGTTTGCTTGATTGCACGTTG<br>CTG                                                                 |
| OBS6969 | CTTTGCCACTATTAACGAGGGTTTTAGAGCTAGAAATAGC                                                                                    |
| OBS6970 | CCTCGTTAATAGTGGCAAAGAAAGTCCCATTCGCCACCCG                                                                                    |
| OBS6971 | GCTAGTTTAGCACTAAGTGGAAGCTAAACCACCAGAGAATCATTTCGCGAT<br>GAAGTACGTGATGAACGTTTTGCCACTATTAACGAGGCCGAGACCTTACAA<br>AAGAAAGAGAAAG |
| OBS6972 | CTTTCTTTTCTTTTGTAAAGTCTCGGCCTCGTTAATAGTGGCAAAACGT<br>TCATCACGTACTTCATCGCGAATGATTCTCTGGTGGTTTAGCTTTCCACT<br>TAGTGCTAAACTAGC  |
| OBS4230 | GGGGACAAGTTTGTACAAAAAAGCAGGCTTCATGGGTTCCATCAATAATAAC<br>TTC                                                                 |
| OBS4231 | GGGGACCACTTTGTACAAGAAAGCTGGGTCTTAATACTGGGGTTGTGACTG                                                                         |
| OBS6661 | GAGAATCATTTCGCGATGAAGTACGTGATGAACGTTTTGCCACTATTAACGAG                                                                       |
| OBS6662 | GTGGCAAAACGTTTCATCACGTACTTCATCGCGAATGATTCTCTGGTGGTTTA<br>G                                                                  |
| OBS4108 | GGGGACAAGTTTGTACAAAAAAGCAGGCTTCAGCAGCTCCTCCCCTGGGCA<br>G                                                                    |
| OBS4107 | GGGGACCACTTTGTACAAGAAAGCTGGGTCTTAGTTCTCTTTTAAAATATCT<br>TG                                                                  |
| OBS4110 | GGGGACAAGTTTGTACAAAAAAGCAGGCTTCCCTTTTGACCTTCCCATTT                                                                          |
| OBS4111 | GGGGACCACTTTGTACAAGAAAGCTGGGTCTATTTGCTTGATTGCACGTTG<br>CA                                                                   |

|         |                                                                  |
|---------|------------------------------------------------------------------|
| OBS6644 | GGGGACAAGTTTGTACAAAAAAGCAGGCTTCAAAAAGCCTGACAGCAACG<br>TG         |
| OBS6682 | AGCTCCTCCCCTGGGCAGGCCGCGATATACTAAATTCGAAAAAGCCTGACA<br>GCAACGT   |
| OBS6646 | CGAATTTAGTATATCGGCGGCCTGCCAGGGGAGGAGCTGCTGTAACCAGA<br>GTCCCTCGG  |
| OBS6647 | TCAAACCTCAAGCTGCCGCCGATTTGTTGAAAAACCAACATCATCGCAG<br>AAGATAC     |
| OBS6648 | GGTTTTTTTCAACAAATCGGCGGCAGCTTGAGAGTTTGAATGAGCAGTTTCA<br>TCATTAT  |
| OBS4232 | GGGGACAAGTTTGTACAAAAAAGCAGGCTTCATGGGTATTCCAAAATTTTTC<br>AGG      |
| OBS7063 | GGGGACCACTTTGTACAAGAAAGCTGGGTCTTATTGATCTGAAACATTTGTC<br>ATAG     |
| OBS7080 | GAAAGGGCACATGATGCAGCGAATTTTATCAAAAAGGATACCAATGAAAAG<br>AATTC     |
| OBS7081 | CCTTTTTGATAAAATTCGCTGCATCATGTGCCCTTCTTTTCTCAGTTTTTCTT<br>CAGATTG |

**Table S4: Data collection and refinement statistics.**

|                                    | <b>Pat1C-HLM2</b>    | <b>Pat1C-HLM3</b>      | <b>Pat1C-HLM10</b>  |
|------------------------------------|----------------------|------------------------|---------------------|
| <b>Data collection</b>             |                      |                        |                     |
| Space group                        | I222                 | I222                   | I222                |
| Cell parameters                    |                      |                        |                     |
| a, b, c (Å)                        | 98.3, 116, 122       | 98.4, 122.9, 127       | 97.7, 123, 126.6    |
| $\alpha, \beta, \gamma$ (°)        | 90, 90, 90           | 90, 90, 90             | 90, 90, 90          |
| Resolution (Å)                     | 50-2.6<br>(2.75-2.6) | 50-2.15<br>(2.27-2.15) | 50-1.9<br>(2.0-1.9) |
| Total number of reflections        | 93829                | 124317                 | 249938              |
| Total number of unique reflections | 21634                | 41458                  | 59110               |
| Rsym                               | 0.134 (1.51)         | 0.102 (1.25)           | 0.06 (1.57)         |
| CC (1/2)                           | 99.6 (54.2)          | 99.6 (45.9)            | 99.9 (45.9)         |
| I/ $\sigma$ (I)                    | 6.5 (1)              | 7.5 (0.94)             | 12.15 (0.6)         |
| Completeness (%)                   | 99.1 (98.9)          | 97.3 (93.9)            | 97.2 (88.4)         |
| Redundancy                         | 4.3                  | 3                      | 4.2                 |
| <b>Refinement</b>                  |                      |                        |                     |
| Resolution (Å)                     | 50-2.6               | 50-2.15                | 50-1.9              |
| R (%)                              | 25.6                 | 21.2                   | 20.4                |
| Rfree (%)                          | 26.8                 | 24.6                   | 23.5                |
| R.m.s. deviations                  |                      |                        |                     |
| Bond lengths (Å)                   | 0.01                 | 0.01                   | 0.01                |
| Bond angles (°)                    | 1.12                 | 1.07                   | 1.01                |
| <b>PDB code</b>                    | 5LM5                 | 5LMF                   | 5LMG                |

Numbers in parentheses are for the highest resolution shell.

## Supporting Material References

1. Decker CJ & Parker R (1993) A turnover pathway for both stable and unstable mRNAs in yeast: evidence for a requirement for deadenylation. *Genes Dev* 7(8):1632-1643.
2. Boeck R, Lapeyre B, Brown CE, & Sachs AB (1998) Capped mRNA degradation intermediates accumulate in the yeast *spb8-2* mutant. *Mol Cell Biol* 18(9):5062-5072.
3. Kushnirov VV (2000) Rapid and reliable protein extraction from yeast. *Yeast* 16(9):857-860.
4. Wyers F, Minet M, Dufour ME, Vo LT, & Lacroute F (2000) Deletion of the PAT1 gene affects translation initiation and suppresses a PAB1 gene deletion in yeast. *Mol Cell Biol* 20(10):3538-3549.
5. Zheng L, Baumann U, & Reymond JL (2004) An efficient one-step site-directed and site-saturation mutagenesis protocol. *Nucleic Acids Res* 32(14):e115.
6. Fourati Z, *et al.* (2014) The C-terminal domain from *S. cerevisiae* Pat1 displays two conserved regions involved in decapping factor recruitment. *PLoS one* 9(5):e96828.
7. Kabsch W (1993) Automatic processing of rotation diffraction data from crystals of initially unknown symmetry and cell constants. *J. Appl. Cryst.* 26:795-800.
8. McCoy AJ, *et al.* (2007) Phaser crystallographic software. *Journal of Applied Crystallography* 40(4):658-674.
9. Emsley P & Cowtan K (2004) Coot: model-building tools for molecular graphics. *Acta Crystallogr D Biol Crystallogr* 60(Pt 12 Pt 1):2126-2132.
10. Bricogne G, *et al.* (2011) Buster version 2.8.0 Cambridge, United Kingdom: Global Phasing Ltd.).
11. Baudin-Baillieu A, Guillemet E, Cullin C, & Lacroute F (1997) Construction of a yeast strain deleted for the TRP1 promoter and coding region that enhances the efficiency of the polymerase chain reaction-disruption method. *Yeast* 13(4):353-356.
12. Longtine MS, *et al.* (1998) Additional modules for versatile and economical PCR-based gene deletion and modification in *Saccharomyces cerevisiae*. *Yeast* 14(10):953-961.
13. Ryan OW, *et al.* (2014) Selection of chromosomal DNA libraries using a multiplex CRISPR system. *eLife* 3.
14. Sikorski RS & Hieter P (1989) A system of shuttle vectors and yeast host strains designed for efficient manipulation of DNA in *Saccharomyces cerevisiae*. *Genetics* 122(1):19-27.
